# Supplementary material
Source: PubMed Central journal article supplement (PMC2882172)
Supplement: NIHMS204575-supplement-01.pdf [file NIHMS204575-supplement-01.pdf]

## SUPPLEMENTARY DATA

Table 1s. Genotype distribution of rs4644 in breast cancer patients

| <b>Sample ID</b> | <b>Race</b> | <b>Diagnose</b>                    | <b>Allelic variation at position 64</b> |
|------------------|-------------|------------------------------------|-----------------------------------------|
| 10173 A1         | Asian       | Invasive Ductal Carcinoma          | H/H                                     |
| 10181 A1         | Asian       | Invasive Ductal Carcinoma          | H/H                                     |
| 10195 A1         | Asian       | Invasive Ductal Carcinoma          | H/H                                     |
| 10207 A1         | Asian       | Invasive Ductal Carcinoma          | H/H                                     |
| 10212 A1         | Asian       | Invasive Ductal Carcinoma          | H/H                                     |
| 107 A1           | Asian       | Invasive Ductal Carcinoma          | H/H                                     |
| 114 A1           | Asian       | Invasive Ductal Carcinoma          | H/H                                     |
| 11767 A1         | Asian       | Invasive small lobular carcinoma   | H/H                                     |
| 154 A1           | Asian       | Infiltrating ductal carcinoma      | H/H                                     |
| 163 A1           | Asian       | Interstitial Sarcoma of the breast | H/H                                     |
| 165 A1           | Asian       | Invasive ductal carcinoma          | H/H                                     |
| 170 A1           | Asian       | Invasive ductal carcinoma          | H/H                                     |
| 176 A1           | Asian       | Invasive ductal carcinoma          | H/H                                     |
| 267 A1           | Asian       | Invasive ductal carcinoma          | H/H                                     |
| 311 A1           | Asian       | Invasive ductal carcinoma          | H/H                                     |
| 342 A1           | Asian       | Comedocarcinoma                    | H/H                                     |
| 3489 A1          | Asian       | Infiltrating ductal carcinoma      | H/H                                     |
| 3490 A1          | Asian       | Infiltrating ductal carcinoma      | H/H                                     |
| 3495 A1          | Asian       | Invasive ductal carcinoma          | H/H                                     |
| 3512 A1          | Asian       | Invasive small lobe carcinoma      | H/H                                     |
| 3569 A1          | Asian       | Carcinoma simplex of breast        | H/H                                     |
| 3631 A1          | Asian       | Carcinoma simplex of breast        | H/H                                     |
| 3635 A1          | Asian       | Breast cancer                      | H/H                                     |
| 3811 A1          | Asian       | Breast cancer                      | H/H                                     |
| 3821 A1          | Asian       | Breast cancer                      | H/H                                     |
| 3822 A1          | Asian       | Invasive ductal carcinoma          | H/H                                     |
| 3831 A1          | Asian       | Invasive ductal carcinoma          | H/H                                     |
| 3871 B1          | Asian       | Simplex carcinoma                  | H/H                                     |
| 3900 A1          | Asian       | Carcinoma simplex of breast        | H/H                                     |
| 4241 A1          | Asian       | Breast cancer                      | H/H                                     |
| 452 A1           | Asian       | Breast cancer                      | H/H                                     |
| 4703 A1          | Asian       | Invasive ductal carcinoma          | H/H                                     |
| 6873 A1          | Asian       | Breast cancer                      | H/H                                     |
| 6879 A1          | Asian       | Invasive ductal carcinoma          | H/H                                     |
| 6884 A1          | Asian       | Invasive ductal carcinoma          | H/H                                     |
| 7350 B1          | Asian       | Carcinoma simplex                  | H/H                                     |
| 7746 B1          | Asian       | Scirrhus carcinoma                 | H/H                                     |
| 9361 A1          | Asian       | Infiltrating ductal carcinoma      | H/H                                     |
| 9578 A1          | Asian       | Invasive ductal carcinoma          | H/H                                     |
| 9579 A1          | Asian       | Infiltrating ductal carcinoma      | H/H                                     |

|          |           |                                    |     |
|----------|-----------|------------------------------------|-----|
| 9611 A1  | Asian     | Invasive ductal carcinoma          | H/H |
| 9626 A1  | Asian     | Invasive ductal carcinoma          | H/H |
| 9776 B1  | Asian     | Invasive ductal carcinoma          | H/H |
| 22B      | Asian     | Invasive ductal carcinoma          | H/P |
| 343      | Asian     | Invasive ductal carcinoma          | H/P |
| 9612     | Asian     | Invasive ductal carcinoma          | H/P |
| 4678     | Asian     | Invasive ductal carcinoma          | H/P |
| 10       | Asian     | Invasive ductal carcinoma          | H/P |
| 3866     | Asian     | Invasive ductal carcinoma          | P/P |
| 10201    | Asian     | Invasive ductal carcinoma          | P/P |
| 10167 A1 | Asian     | Invasive ductal carcinoma          | P/P |
| 10172 A1 | Asian     | Invasive ductal carcinoma          | P/P |
| 3823     | Asian     | Invasive ductal carcinoma          | P/P |
| 4899     | Caucasian | Lobular carcinoma                  | H/H |
| 7181     | Caucasian | Ductal carcinoma                   | H/H |
| 11466 B1 | Caucasian | Ductal carcinoma                   | H/H |
| 11678 A1 | Caucasian | Infiltrating duct breast carcinoma | H/H |
| 14894 A1 | Caucasian | Lobular carcinoma                  | H/H |
| 1731 B1  | Caucasian | Infiltrating ductal carcinoma      | H/H |
| 1772 A1  | Caucasian | Infiltrating ductal carcinoma      | H/H |
| 1778 B1  | Caucasian | Infiltrating ductal carcinoma      | H/H |
| 199 A1   | Caucasian | Infiltrating ductal carcinoma      | H/H |
| 336 A1   | Caucasian | Infiltrating ductal carcinoma      | H/H |
| 4047 A1  | Caucasian | Infiltrating ductal carcinoma      | H/H |
| 4526 B1  | Caucasian | Lobular carcinoma                  | H/H |
| 4541 B1  | Caucasian | Lobular carcinoma                  | H/H |
| 4607 A1  | Caucasian | Infiltrating ductal carcinoma      | H/H |
| 5470 B1  | Caucasian | Lobular carcinoma                  | H/H |
| 5521 B1  | Caucasian | Infiltrating ductal carcinoma      | H/H |
| 5860 A1  | Caucasian | Infiltrating ductal carcinoma      | H/H |
| 6617 A1  | Caucasian | Lobular breast carcinoma           | H/H |
| 6660 A1  | Caucasian | Infiltrating ductal carcinoma      | H/H |
| 6699 B1  | Caucasian | Infiltrating lobular carcinoma     | H/H |
| 6711 A1  | Caucasian | Infiltrating ductal carcinoma      | H/H |
| 6713 A1  | Caucasian | Infiltrating ductal carcinoma      | H/H |
| 6716 A1  | Caucasian | Lobular carcinoma                  | H/H |
| 6731 A1  | Caucasian | Infiltrating ductal carcinoma      | H/H |
| 69 A1    | Caucasian | Infiltrating ductal carcinoma      | H/H |
| 7328 B1  | Caucasian | Lobular carcinoma                  | H/H |
| 7331 B1  | Caucasian | Infiltrating duct carcinoma        | H/H |
| 7354 B1  | Caucasian | Lobular carcinoma                  | H/H |
| 7376 B1  | Caucasian | Lobular carcinoma                  | H/H |
| 7391 B1  | Caucasian | Infiltrating ductal carcinoma      | H/H |
| 7409 B1  | Caucasian | Lobular carcinoma                  | H/H |
| 7411 B1  | Caucasian | Lobular carcinoma                  | H/H |
| 7415 B1  | Caucasian | Infiltrating Ductal Carcinoma      | H/H |

|         |           |                               |     |
|---------|-----------|-------------------------------|-----|
| 8276 A1 | Caucasian | Infiltrating Ductal Carcinoma | H/H |
| 8301 A1 | Caucasian | Infiltrating Ductal Carcinoma | H/H |
| 9293 A1 | Caucasian | Infiltrating Ductal Carcinoma | H/H |
| 9307 A1 | Caucasian | Infiltrating Ductal Carcinoma | H/H |
| 9329 A1 | Caucasian | Infiltrating Ductal Carcinoma | H/H |
| 9352 A1 | Caucasian | Infiltrating Ductal Carcinoma | H/H |
| 9390 A1 | Caucasian | Infiltrating Ductal Carcinoma | H/H |
| 9895 B1 | Caucasian | Infiltrating Ductal Carcinoma | H/H |
| 12      | Caucasian | Lobular carcinoma             | H/H |
| 14      | Caucasian | Infiltrating Ductal Carcinoma | H/H |
| 42      | Caucasian | Infiltrating Ductal Carcinoma | H/H |
| 51      | Caucasian | Infiltrating Ductal Carcinoma | H/H |
| 60      | Caucasian | Infiltrating Ductal Carcinoma | H/H |
| 85      | Caucasian | Infiltrating Ductal Carcinoma | H/H |
| 91      | Caucasian | Infiltrating Ductal Carcinoma | H/H |
| 1AD     | Caucasian | Infiltrating Ductal Carcinoma | H/H |
| 20AD    | Caucasian | Infiltrating Ductal Carcinoma | H/H |
| 3AD     | Caucasian | Infiltrating Ductal Carcinoma | H/H |
| 5AD     | Caucasian | Infiltrating Ductal Carcinoma | H/H |
| 7AD     | Caucasian | Infiltrating Ductal Carcinoma | H/H |
| 4067 A1 | Caucasian | Breast cancer                 | H/H |
| 4108 A1 | Caucasian | Infiltrating Ductal Carcinoma | H/H |
| 4153 A1 | Caucasian | Infiltrating Ductal Carcinoma | H/P |
| 83      | Caucasian | Breast cancer                 | H/P |
| 4069    | Caucasian | Infiltrating Ductal Carcinoma | H/P |
| 6713    | Caucasian | Infiltrating Ductal Carcinoma | H/P |
| 7852    | Caucasian | Infiltrating Ductal Carcinoma | H/P |
| 9394    | Caucasian | Infiltrating Ductal Carcinoma | H/P |
| 4       | Caucasian | Breast cancer                 | H/P |
| 5       | Caucasian | Breast cancer                 | H/P |
| 6       | Caucasian | Breast cancer                 | H/P |
| 9       | Caucasian | Breast cancer                 | H/P |
| 15      | Caucasian | Breast cancer                 | H/P |
| 19      | Caucasian | Breast cancer                 | H/P |
| 29      | Caucasian | Breast cancer                 | H/P |
| 36      | Caucasian | Breast cancer                 | H/P |
| 41      | Caucasian | Breast cancer                 | H/P |
| 43      | Caucasian | Breast cancer                 | H/P |
| 44      | Caucasian | Breast cancer                 | H/P |
| 52      | Caucasian | Breast cancer                 | H/P |
| 56      | Caucasian | Breast cancer                 | H/P |
| 57      | Caucasian | Breast cancer                 | H/P |
| 59      | Caucasian | Breast cancer                 | H/P |
| 61      | Caucasian | Breast cancer                 | H/P |
| 62      | Caucasian | Breast cancer                 | H/P |
| 64      | Caucasian | Breast cancer                 | H/P |

|          |           |                                |     |
|----------|-----------|--------------------------------|-----|
| 70       | Caucasian | Breast cancer                  | H/P |
| 71       | Caucasian | Breast cancer                  | H/P |
| 75       | Caucasian | Breast cancer                  | H/P |
| 80       | Caucasian | Breast cancer                  | H/P |
| 82       | Caucasian | Breast cancer                  | H/P |
| 86       | Caucasian | Breast cancer                  | H/P |
| 87       | Caucasian | Breast cancer                  | H/P |
| 89       | Caucasian | Breast cancer                  | H/P |
| 90       | Caucasian | Breast cancer                  | H/P |
| 94       | Caucasian | Breast cancer                  | H/P |
| 99       | Caucasian | Breast cancer                  | H/P |
| 100      | Caucasian | Breast cancer                  | H/P |
| 18AD     | Caucasian | Infiltrating Ductal Carcinoma  | H/P |
| 10AD     | Caucasian | Infiltrating Ductal Carcinoma  | H/P |
| 11AD     | Caucasian | Infiltrating Ductal Carcinoma  | H/P |
| 12AD     | Caucasian | Infiltrating Ductal Carcinoma  | H/P |
| 15AD     | Caucasian | Infiltrating Ductal Carcinoma  | H/P |
| 17AD     | Caucasian | Infiltrating Ductal Carcinoma  | H/P |
| 18AD     | Caucasian | Infiltrating Ductal Carcinoma  | H/P |
| 19AD     | Caucasian | Infiltrating Ductal Carcinoma  | H/P |
| 4AD      | Caucasian | Infiltrating Ductal Carcinoma  | H/P |
| 9AD      | Caucasian | Infiltrating Ductal Carcinoma  | H/P |
| 2633     | Caucasian | Infiltrating ductal carcinoma  | H/P |
| 3133     | Caucasian | Infiltrating ductal carcinoma  | H/P |
| 3879     | Caucasian | Infiltrating ductal carcinoma  | H/P |
| 4097     | Caucasian | Lobular carcinoma              | H/P |
| 4235     | Caucasian | Lobular carcinoma              | H/P |
| 5041     | Caucasian | Infiltrating ductal carcinoma  | H/P |
| 14067 B1 | Caucasian | Lobular carcinoma              | H/P |
| 17370 B1 | Caucasian | Infiltrating ductal carcinoma  | H/P |
| 40869 A1 | Caucasian | Infiltrating ductal carcinoma  | H/P |
| 40979 B1 | Caucasian | Lobular breast carcinoma       | H/P |
| 4465 A1  | Caucasian | Infiltrating ductal carcinoma  | H/P |
| 5550 B1  | Caucasian | Infiltrating lobular carcinoma | H/P |
| 6661 B1  | Caucasian | Infiltrating ductal carcinoma  | H/P |
| 6712 A1  | Caucasian | Infiltrating ductal carcinoma  | H/P |
| 9185 B1  | Caucasian | Lobular carcinoma              | H/P |
| 9904 B1  | Caucasian | Infiltrating ductal carcinoma  | H/P |
| 2943     | Caucasian | Infiltrating ductal carcinoma  | P/P |
| 39       | Caucasian | Breast cancer                  | P/P |
| 4123     | Caucasian | Infiltrating ductal carcinoma  | P/P |
| 6AD      | Caucasian | Infiltrating ductal carcinoma  | P/P |
| 2974     | Caucasian | Infiltrating ductal carcinoma  | P/P |
| 3556     | Caucasian | Infiltrating ductal carcinoma  | P/P |
| 4496     | Caucasian | Infiltrating ductal carcinoma  | P/P |
| 4566     | Caucasian | Infiltrating ductal carcinoma  | P/P |

|         |           |                               |     |
|---------|-----------|-------------------------------|-----|
| 4870    | Caucasian | Infiltrating ductal carcinoma | P/P |
| 7092    | Caucasian | Infiltrating ductal carcinoma | P/P |
| 7145    | Caucasian | Infiltrating ductal carcinoma | P/P |
| 4472 A1 | Caucasian | Infiltrating ductal carcinoma | P/P |
| 9892    | Caucasian | Infiltrating ductal carcinoma | P/P |
| 1       | Caucasian | Breast cancer                 | P/P |
| 3       | Caucasian | Breast cancer                 | P/P |
| 7       | Caucasian | Breast cancer                 | P/P |
| 8       | Caucasian | Breast cancer                 | P/P |
| 11      | Caucasian | Breast cancer                 | P/P |
| 20      | Caucasian | Breast cancer                 | P/P |
| 22      | Caucasian | Breast cancer                 | P/P |
| 23      | Caucasian | Breast cancer                 | P/P |
| 26      | Caucasian | Breast cancer                 | P/P |
| 27      | Caucasian | Breast cancer                 | P/P |
| 30      | Caucasian | Breast cancer                 | P/P |
| 32      | Caucasian | Breast cancer                 | P/P |
| 34      | Caucasian | Breast cancer                 | P/P |
| 37      | Caucasian | Breast cancer                 | P/P |
| 38      | Caucasian | Breast cancer                 | P/P |
| 40      | Caucasian | Breast cancer                 | P/P |
| 47      | Caucasian | Breast cancer                 | P/P |
| 48      | Caucasian | Breast cancer                 | P/P |
| 49      | Caucasian | Breast cancer                 | P/P |
| 54      | Caucasian | Breast cancer                 | P/P |
| 55      | Caucasian | Breast cancer                 | P/P |
| 58      | Caucasian | Breast cancer                 | P/P |
| 67      | Caucasian | Breast cancer                 | P/P |
| 69      | Caucasian | Breast cancer                 | P/P |
| 73      | Caucasian | Breast cancer                 | P/P |
| 74      | Caucasian | Breast cancer                 | P/P |
| 81      | Caucasian | Breast cancer                 | P/P |
| 84      | Caucasian | Breast cancer                 | P/P |
| 95      | Caucasian | Breast cancer                 | P/P |
| 96      | Caucasian | Breast cancer                 | P/P |
| 97      | Caucasian | Breast cancer                 | P/P |
| 98      | Caucasian | Breast cancer                 | P/P |
| 13AD    | Caucasian | Infiltrating ductal carcinoma | P/P |
| 14AD    | Caucasian | Infiltrating ductal carcinoma | P/P |
| 16AD    | Caucasian | Infiltrating ductal carcinoma | P/P |
| 8AD     | Caucasian | Infiltrating ductal carcinoma | P/P |
| 2AD     | Caucasian | Infiltrating ductal carcinoma | P/P |

Table 2s: Genotype distribution of rs4644 in breast cancer versus surrounding normal tissue and blood

| <b>Race</b> | <b>DNA Blood</b> | <b>DNA Normal</b> | <b>DNA Cancer</b> | <b>RNA cancer</b> | <b>RNA Normal</b> |
|-------------|------------------|-------------------|-------------------|-------------------|-------------------|
| Caucasian   | NA               | H/P               | H/P               | NA                | NA                |
| Caucasian   | NA               | H                 | H                 | NA                | NA                |
| Caucasian   | NA               | H/P               | H/P               | NA                | NA                |
| Caucasian   | NA               | H                 | H                 | NA                | NA                |
| Caucasian   | NA               | H/P               | H/P               | NA                | NA                |
| Caucasian   | NA               | H                 | H                 | NA                | NA                |
| Caucasian   | NA               | H/P               | H/P               | NA                | NA                |
| Caucasian   | NA               | H                 | H                 | NA                | NA                |
| Caucasian   | NA               | H/P               | H/P               | NA                | NA                |
| Caucasian   | NA               | H                 | H                 | NA                | NA                |
| Caucasian   | H/H              | H/H               | H/H               | H/H               | H/H               |
| Caucasian   | P/P              | P/P               | P/P               | P/P               | P/P               |
| Caucasian   | H/H              | H/H               | H/H               | H/H               | NA                |
| Caucasian   | H/H              | H/H               | H/H               | H/H               | H/H               |
| Caucasian   | H/H              | H/H               | H/H               | H/H               | H/H               |
| Caucasian   | P/P              | P/P               | P/P               | P/P               | NA                |
| Caucasian   | H/P              | H/P               | H/P               | H/P               | NA                |
| Caucasian   | H/P              | H/P               | H/P               | H/P               | H/P               |
| Caucasian   | H/P              | H/P               | H/P               | H/P               | H/P               |
| Caucasian   | P/P              | P/P               | P/P               | NA                | NA                |
| Caucasian   | P/P              | P/P               | P/P               | P/P               | P/P               |
| Caucasian   | H/P              | H/P               | H/P               | H/P               | H/P               |
| Caucasian   | P/P              | P/P               | P/P               | P/P               | NA                |
| Caucasian   | H/P              | H/P               | H/P               | H/P               | H/P               |
| Caucasian   | H/P              | H/P               | H/P               | H/P               | H/P               |
| Caucasian   | H/P              | H/P               | H/P               | H/P               | H/P               |
| Caucasian   | H/H              | H/H               | H/H               | H/H               | H/H               |
| Asian       | H/P              | H/P               | H/P               | NA                | NA                |
| Asian       | H                | H                 | H                 | NA                | NA                |
| Asian       | H/P              | H/P               | H/P               | NA                | NA                |
| Asian       | H/P              | H/P               | H/P               | NA                | NA                |
| Asian       | H                | H                 | H                 | NA                | NA                |
| Asian       | H                | H                 | H                 | NA                | NA                |
| Asian       | H                | H                 | H                 | NA                | NA                |
| Asian       | H                | H                 | H                 | NA                | NA                |
| Asian       | H                | H                 | H                 | NA                | NA                |
| Asian       | H/P              | H/P               | H/P               | NA                | NA                |
| Asian       | H                | H                 | H                 | NA                | NA                |
| Asian       | H/P              | H/P               | H/P               | NA                | NA                |
| Asian       | H/P              | H/P               | H/P               | NA                | NA                |
| Asian       | H/P              | H/P               | H/P               | NA                | NA                |
| Asian       | H/P              | H/P               | H/P               | NA                | NA                |
| Asian       | H/P              | H/P               | H/P               | NA                | NA                |

NA-Not Available
